# Supplementary material for: Potential Cancer Risk in Patients with Rheumatoid Arthritis: A Longitudinal Korean Population-Based Analysis
Source: MDPI journal article supplement (doi:10.3390/jpm12060965), 2022-06-13
Supplement: s1 [file s1]

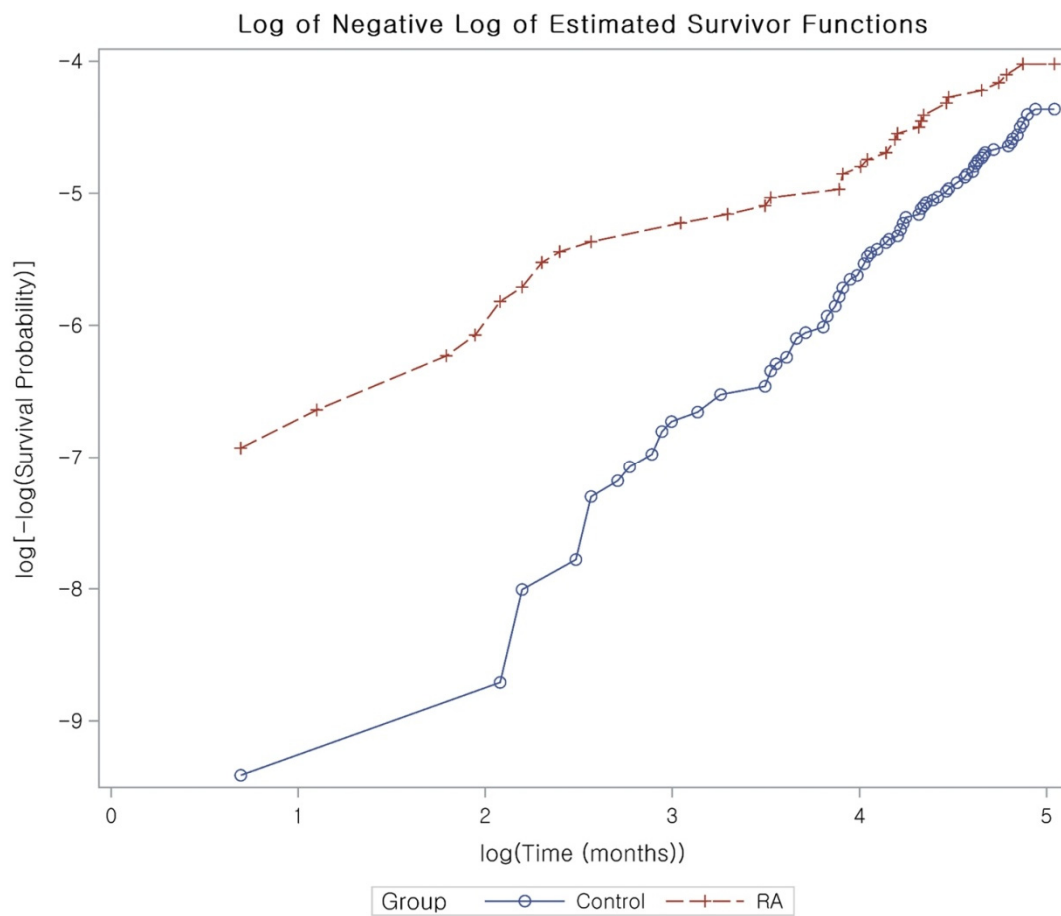

**Supplementary Figure S1.** The proportional hazard assumptions are demonstrated by building log-minus-log plots, and no violations of these assumptions are identified.
